# Supplementary material
Source: PubMed Central journal article supplement (PMC2556041)
Supplement: NIHMS61617-supplement-si20060929_103.pdf [file NIHMS61617-supplement-si20060929_103.pdf]

## Supporting Information

### Characterization of Four Covalently-Linked Yeast Cytochrome *c*/Cytochrome *c* Peroxidase Complexes: Evidence for Electrostatic Interaction between Bound Cytochrome *c* Molecules

*Siddhartha Nakani, Lidia B. Vitello, and James E. Erman*

Department of Chemistry and Biochemistry, Northern Illinois University, DeKalb, IL 60115

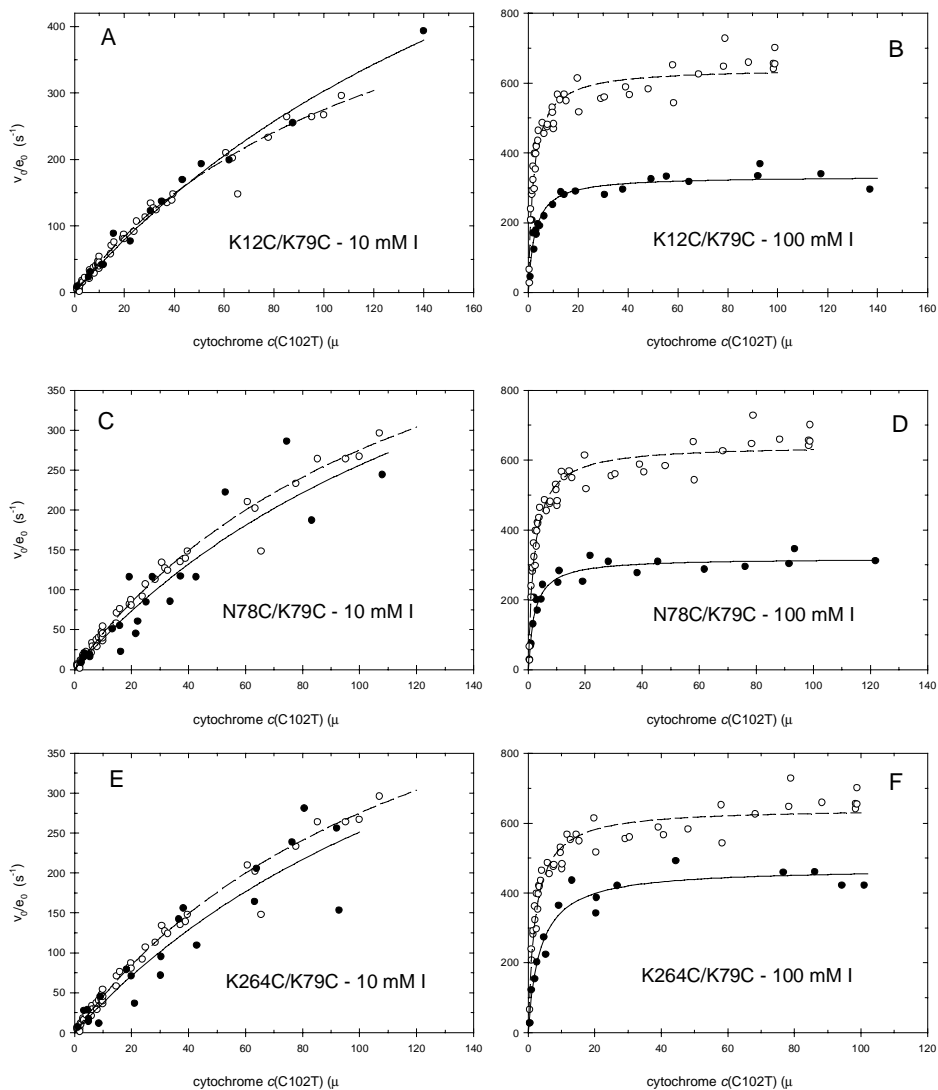

Figure S1: Steady-state velocities for recombinant yeast iso-1 ferrocyanochrome *c* oxidation as a function of substrate concentration for three covalent complexes. Left-hand panels - 10 mM ionic strength. Right-hand panels - 100 mM ionic strength. The covalent complex data is given in solid circles and the rCcP data in open circles. Panels A and B - K12C/K79C; Panels C and D - N78C/K79C; and Panels E and F - K264C/L79C. Potassium phosphate buffer, pH 7.5, 25 °C,  $[H_2O_2] = 200 \mu$ M.
